# Supplementary material for: Predicting the outcomes of interpolyelectrolyte neutralization at surfaces on the basis of complexation experiments and vice versa
Source: Royal Society of Chemistry journal article supplement (doi:10.1039/d1sm01308d), 2021-12-06
Supplement: d1sm01308d1.pdf [file d1sm01308d1.pdf]

## Supporting information

### **Predicting the outcomes of interpolyelectrolyte neutralization at surfaces on the basis of complexation experiments and *vice versa***

**Jasmina Jukić<sup>a</sup>, Davor Kovačević<sup>a</sup>, Nikola Cindro<sup>a</sup>, Rok Fink<sup>b</sup>, Martina Oder<sup>b</sup>, Ana-Marija Milisav<sup>b,1</sup>, and Josip Požar<sup>b,\*</sup>**

<sup>a</sup>*Division of Physical Chemistry, Department of Chemistry, Faculty of Science, University of Zagreb, Horvatovac 102a, 10000 Zagreb, Croatia*

<sup>b</sup>*Faculty of Health Sciences, University of Ljubljana, Zdravstvena pot 5, 1000 Ljubljana, Slovenia*

---

<sup>1</sup> Present address: Laboratory for Biocolloids and Surface Chemistry, Division of Physical Chemistry, Ruđer Bošković Institute, Bijenička cesta 54, 10000 Zagreb, Croatia

\* Corresponding author. E-mail: [pozar@chem.pmf.hr](mailto:pozar@chem.pmf.hr)

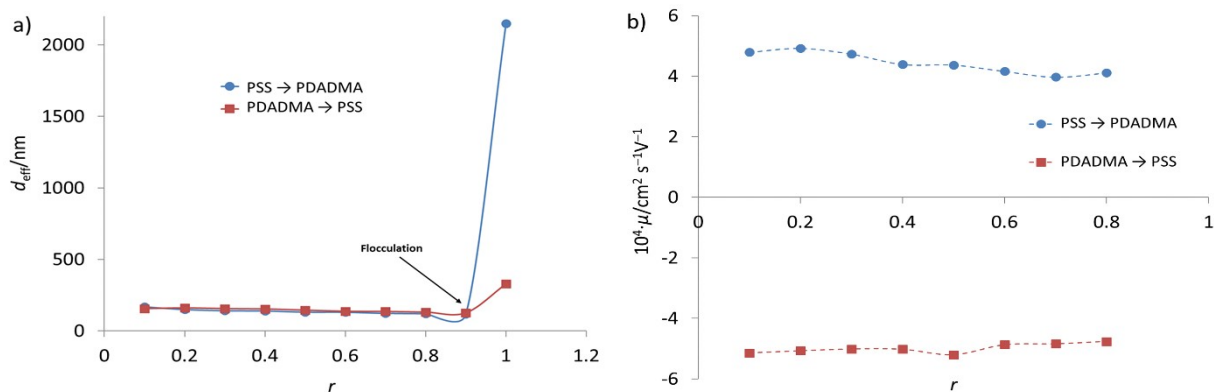

Figure S1. a) Mean effective hydrodynamic diameters and (b) electrophoretic mobilities of complexes prepared by titrations of PDADMA·Cl with Na·PSS and *vice versa* at 25 °C;  $c_m(\text{titrand}) = 1 \times 10^{-3} \text{ mol dm}^{-3}$ ,  $c_m(\text{titrant}) = 2 \times 10^{-2} \text{ mol dm}^{-3}$ .

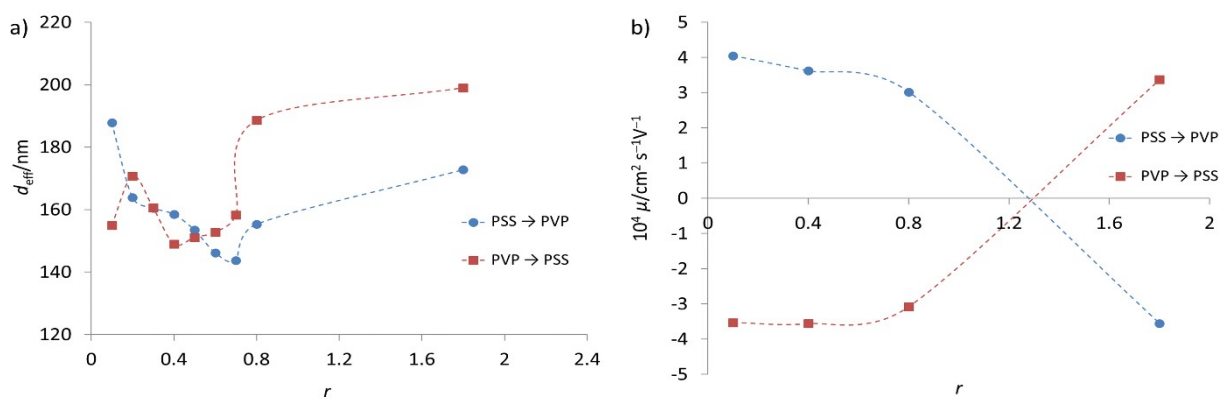

Figure S2. a) Mean effective hydrodynamic diameters and (b) electrophoretic mobilities of complexes prepared by titrations of PVP·Br with Na·PSS and *vice versa* followed by abrupt addition of one equivalent of titrant at 25 °C;  $c_m(\text{titrand}) = 1 \times 10^{-3} \text{ mol dm}^{-3}$ ,  $c_m(\text{titrant}) = 2 \times 10^{-2} \text{ mol dm}^{-3}$ .

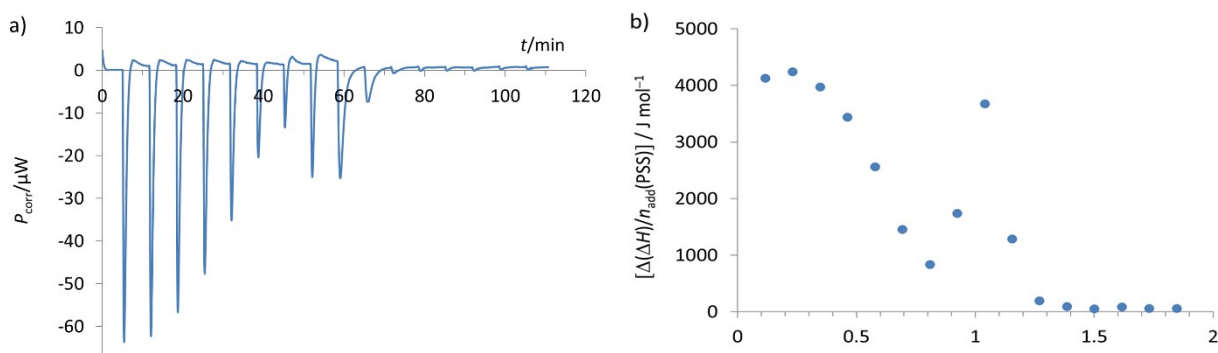

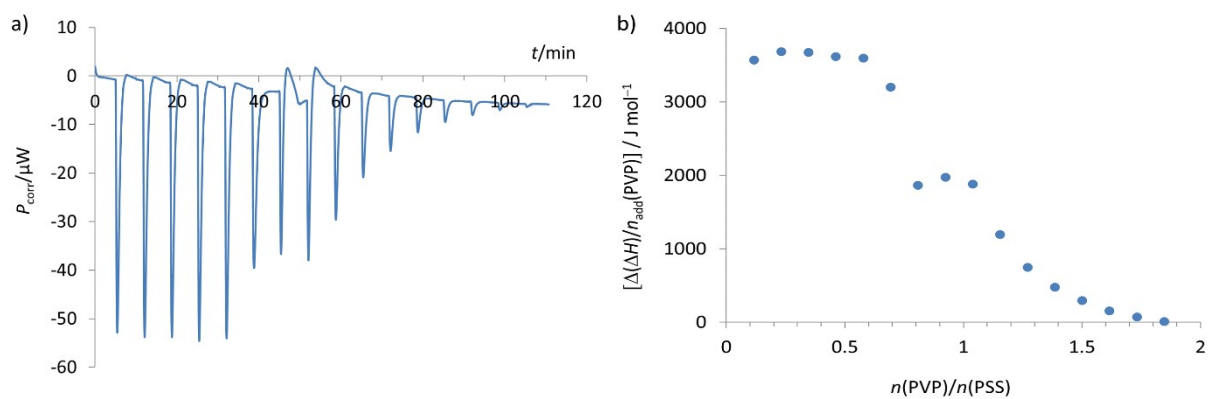

Figure S4. a) Corrected (stacked) thermograms and, b) successive normalized enthalpy changes (divided by amount of titrant monomer added) obtained during Na·PSS ( $c_m = 5 \times 10^{-3} \text{ mol dm}^{-3}$ ,  $V = 1.3 \text{ mL}$ ) titration with PVP·Br, ( $c_m = 5 \times 10^{-2} \text{ mol dm}^{-3}$ ),  $\vartheta = 25.0 \text{ }^\circ\text{C}$ .

Table S1. Enthalpies of PVP-PSS primary complex formation at  $25.0 \text{ }^\circ\text{C}$ .

| $(\Delta_r H_{\text{PSS} \rightarrow \text{PVP}} \pm \text{SE})/\text{kJ mol}^{-1}$ | $(\Delta_r H_{\text{PVP} \rightarrow \text{PSS}} \pm \text{SE})/\text{kJ mol}^{-1}$ |
|-------------------------------------------------------------------------------------|-------------------------------------------------------------------------------------|
| $1.95 \pm 0.03$                                                                     | $0.90 \pm 0.03$                                                                     |

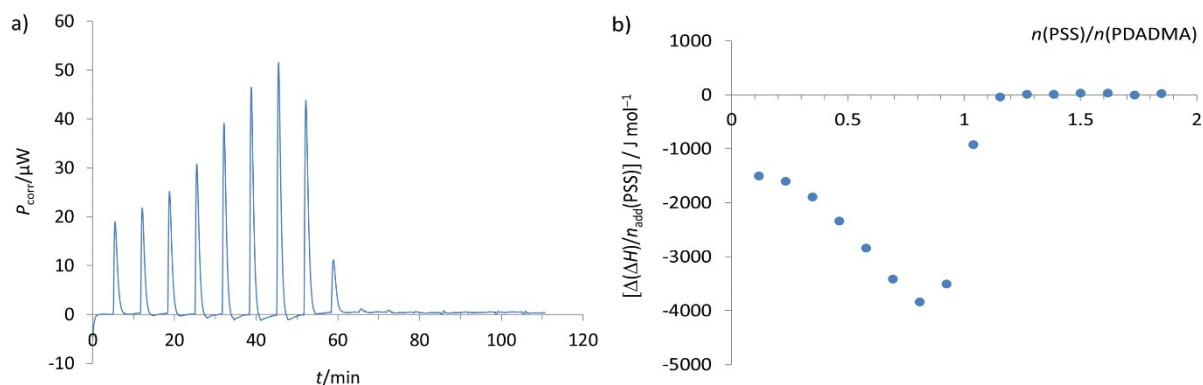

Figure S5. a) Corrected (stacked) thermogram and, b) successive normalized enthalpy changes (divided by amount of titrant monomer added) obtained during PDADMA·Cl titration ( $c_m = 5 \times 10^{-3} \text{ mol dm}^{-3}$ ,  $V = 1.3 \text{ mL}$ ) with Na·PSS ( $c_m = 5 \times 10^{-2} \text{ mol dm}^{-3}$ ),  $\vartheta = 25.0 \text{ }^\circ\text{C}$ .

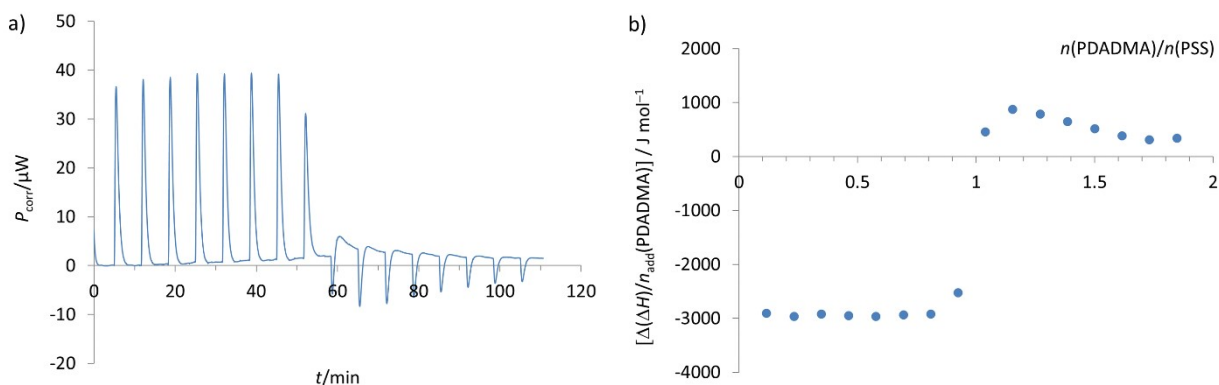

Figure S6. a) Corrected (stacked) thermograms and, b) successive normalized enthalpy changes (divided by amount of titrant monomer added) obtained during Na·PSS ( $c_m = 5 \times 10^{-3} \text{ mol dm}^{-3}$ ,  $V = 1.3 \text{ mL}$ ) titration with PDADMA·Cl ( $c_m = 5 \times 10^{-2} \text{ mol dm}^{-3}$ ),  $\vartheta = 25.0 \text{ }^\circ\text{C}$ .

Table S2. Enthalpies of PDADMA-PSS primary complex formation at  $25.0 \text{ }^\circ\text{C}$ .

| $(\Delta_r H_{\text{PSS} \rightarrow \text{PDADMA}} \pm \text{SE}) / \text{kJ mol}^{-1}$ | $(\Delta_r H_{\text{PDADMA} \rightarrow \text{PSS}} \pm \text{SE}) / \text{kJ mol}^{-1}$ |
|------------------------------------------------------------------------------------------|------------------------------------------------------------------------------------------|
| $-2.89 \pm 0.01$                                                                         | $-2.60 \pm 0.09$                                                                         |

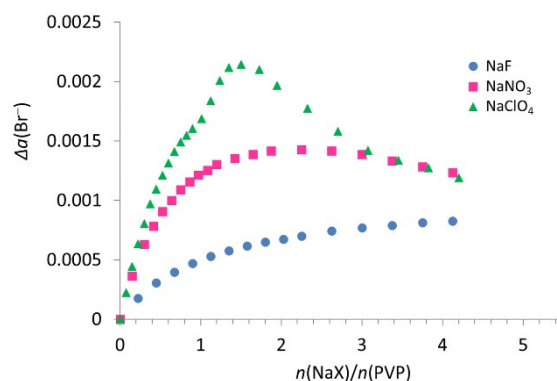

Figure S7. Potentiometric titration of PVP·Br with sodium salt solutions containing different anions;  $c_m(\text{PVP} \cdot \text{Br}) = 3 \times 10^{-3} \text{ mol dm}^{-3}$ ,  $V(\text{PVP} \cdot \text{Br}) = 40 \text{ mL}$ ,  $c(\text{NaX}) = 0.9 \text{ mol dm}^{-3}$ ,  $\vartheta = 25.0 \text{ }^\circ\text{C}$ .

The peculiar decrease in  $\text{Br}^-$  activity above approximately 1:1 monomolar ratio in the case of PVP titration with  $\text{NaClO}_4$  is induced by precipitation of  $\text{PVP} \cdot \text{ClO}_4$  salt. -The formation of precipitate changes the ionic strength of solution thereby affecting the activity or released bromides.

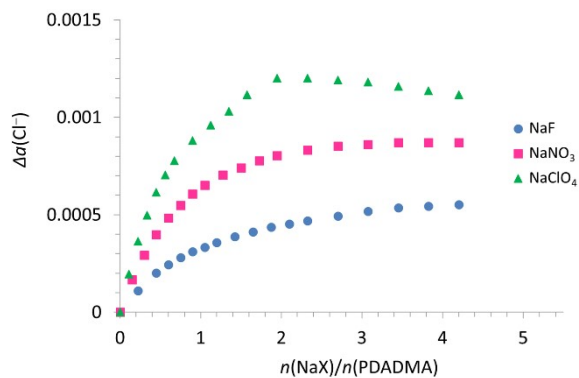

Figure S8. Potentiometric titration of PDADMA·Cl with sodium salts solutions containing different anions;  $c_m(\text{PDADMA}\cdot\text{Cl}) = 3 \times 10^{-3} \text{ mol dm}^{-3}$ ,  $V_0(\text{PDADMA}\cdot\text{Cl}) = 40 \text{ mL}$ ,  $c(\text{NaX}) = 0.9 \text{ mol dm}^{-3}$ ,  $\vartheta = 25.0 \text{ }^\circ\text{C}$ .

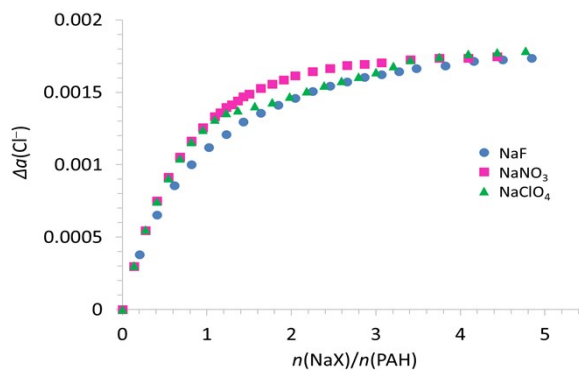

Figure S9. Potentiometric titration of PAH·Cl with sodium salt solutions containing different anions;  $c_m(\text{PAH}\cdot\text{Cl}) = 3 \times 10^{-3} \text{ mol dm}^{-3}$ ,  $V(\text{PAH}\cdot\text{Cl}) = 40 \text{ mL}$ ,  $c(\text{NaX}) = 0.9 \text{ mol dm}^{-3}$ ,  $\vartheta = 25.0 \text{ }^\circ\text{C}$ .

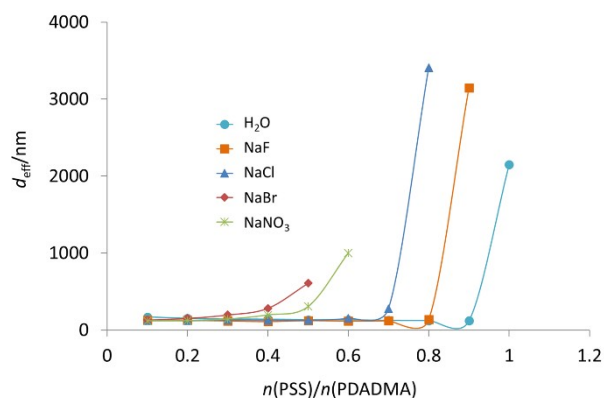

Figure S10. Mean effective hydrodynamic diameters of complexes prepared by titration of PDADMA·Cl ( $c_m = 1.0 \times 10^{-3} \text{ mol dm}^{-3}$ ,  $V_0 = 2.0 \text{ mL}$ ) with Na·PSS ( $c_m = 2.0 \times 10^{-2} \text{ mol dm}^{-3}$ ) in  $0.1 \text{ mol dm}^{-3}$  salt solutions at  $25 \text{ }^\circ\text{C}$ .

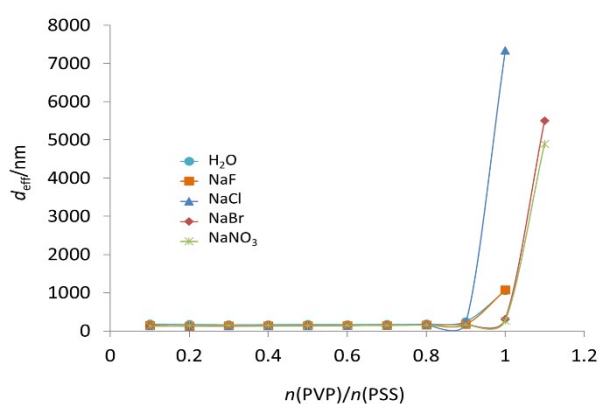

Figure S11. Mean effective hydrodynamic diameters of complexes prepared by titration of Na·PSS ( $c_m = 1.0 \times 10^{-3} \text{ mol dm}^{-3}$ ,  $V = 2.0 \text{ mL}$ ) with PVP·Br ( $c_m = 2.0 \times 10^{-2} \text{ mol dm}^{-3}$ ) in  $0.1 \text{ mol dm}^{-3}$  salt solutions at  $25 \text{ }^\circ\text{C}$ .

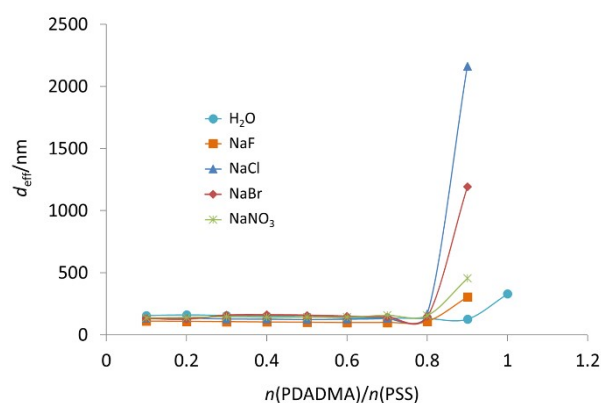

Figure S12. Mean effective hydrodynamic diameters of complexes prepared by titration of Na·PSS ( $c_m = 1.0 \times 10^{-3} \text{ mol dm}^{-3}$ ,  $V = 2.0 \text{ mL}$ ) with PDADMA·Cl ( $c_m = 2.0 \times 10^{-2} \text{ mol dm}^{-3}$ ) in  $0.1 \text{ mol dm}^{-3}$  salt solutions at  $25 \text{ }^\circ\text{C}$ .

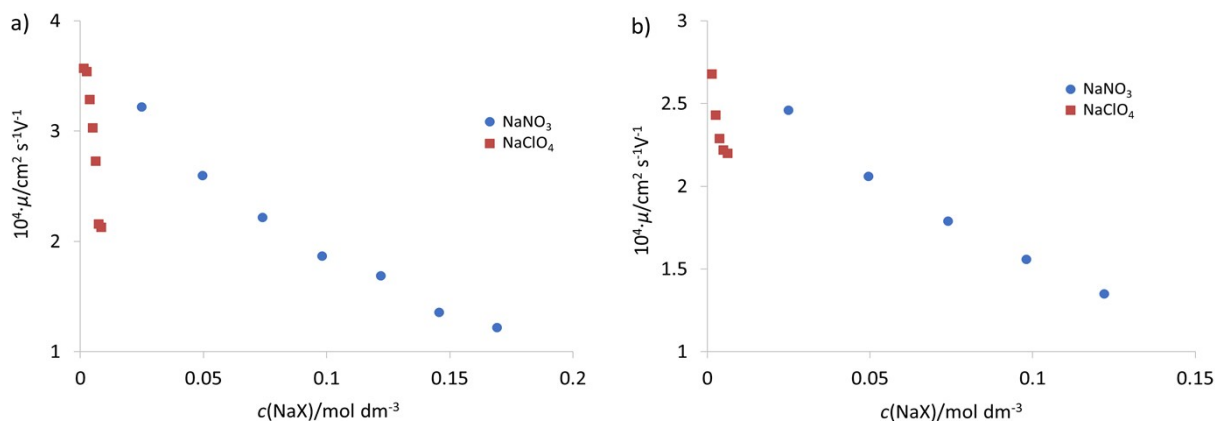

Figure S13. Electrophoretic mobility of particles obtained by titrating positive a) PDADMA-PSS and b) positive PVP-PSS complexes ( $n(\text{PSS})/n(\text{polycation}) = 0.5$ ) with  $\text{NaNO}_3$  ( $c = 5 \text{ mol dm}^{-3}$ ) and  $\text{NaClO}_4$  ( $c = 0.25 \text{ mol dm}^{-3}$ ) at  $25 \text{ }^\circ\text{C}$ . Positive complexes were prepared by the addition of  $\text{Na}\cdot\text{PSS}$  ( $c_m = 5 \times 10^{-2} \text{ mol dm}^{-3}$ ) to solution containing either  $\text{PDADMA}\cdot\text{Cl}$  or  $\text{PVP}\cdot\text{Br}$  ( $c_m = 1 \times 10^{-3} \text{ mol dm}^{-3}$ ,  $V = 2 \text{ mL}$ ).

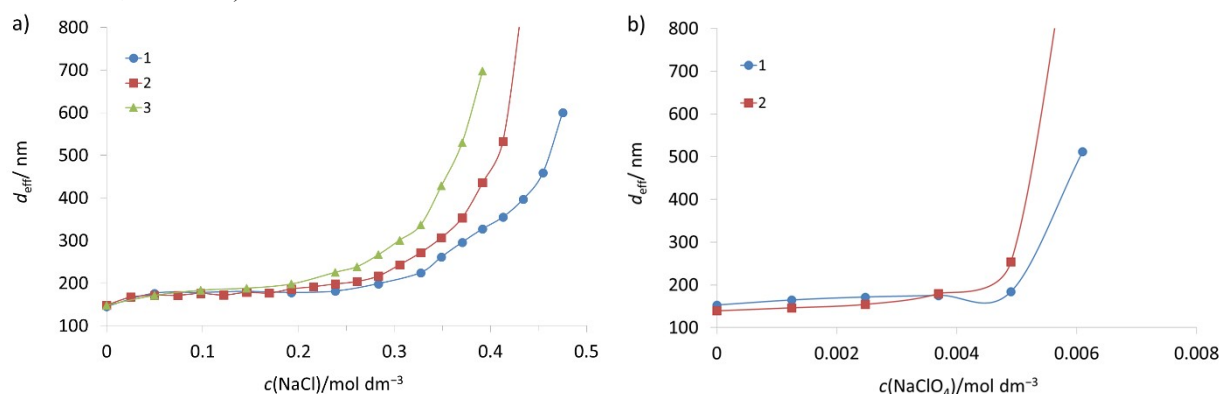

Figure S14. Mean effective hydrodynamic diameters of particles obtained by repetitive titrations of positive PVP-PSS complexes ( $n(\text{PSS})/n(\text{polycation}) = 0.5$ ) with a)  $\text{NaCl}$  ( $c = 5 \text{ mol dm}^{-3}$ ) and b)  $\text{NaClO}_4$  ( $c = 0.25 \text{ mol dm}^{-3}$ ) at  $25 \text{ }^\circ\text{C}$ . Positive complexes were prepared by the addition of  $\text{Na}\cdot\text{PSS}$  ( $c_m = 5 \times 10^{-2} \text{ mol dm}^{-3}$ ) to solution containing  $\text{PVP}\cdot\text{Br}$  ( $c_m = 1 \times 10^{-3} \text{ mol dm}^{-3}$ ,  $V = 2 \text{ mL}$ ).

Table S3. Time dependence of mean effective hydrodynamic diameter of particles obtained by titrating positive PVP-PSS complexes ( $n(\text{PSS})/n(\text{PVP}) = 0.5$ ) with  $\text{NaCl}$  and  $\text{NaBr}$  ( $c = 5 \text{ mol dm}^{-3}$ ) at  $25 \text{ }^\circ\text{C}$ . Positive complexes were prepared by the addition of  $\text{Na}\cdot\text{PSS}$  ( $c_m = 5 \times 10^{-2} \text{ mol dm}^{-3}$ ) to solution containing  $\text{PVP}\cdot\text{Br}$  ( $c_m = 1 \times 10^{-3} \text{ mol dm}^{-3}$ ,  $V = 2 \text{ mL}$ ); CC- coagulation concentration.

| salt          | $c(\text{salt}) / \% \text{ CC}$ | after preparation | $d_{\text{eff}}/\text{nm}$ |      |     |             |
|---------------|----------------------------------|-------------------|----------------------------|------|-----|-------------|
|               |                                  |                   | 1 h                        | 24 h | 3 d | 5 d         |
| $\text{NaCl}$ | 50                               | 223               | 208                        | 244  | 271 | 306         |
| $\text{NaCl}$ | 80                               | 253               | 312                        | 448  | 518 | aggregation |
| $\text{NaBr}$ | 50                               | 205.4             | 192                        | 200  | 202 | 216         |
| $\text{NaBr}$ | 80                               | 210.5             | 239                        | 341  | 684 | aggregation |

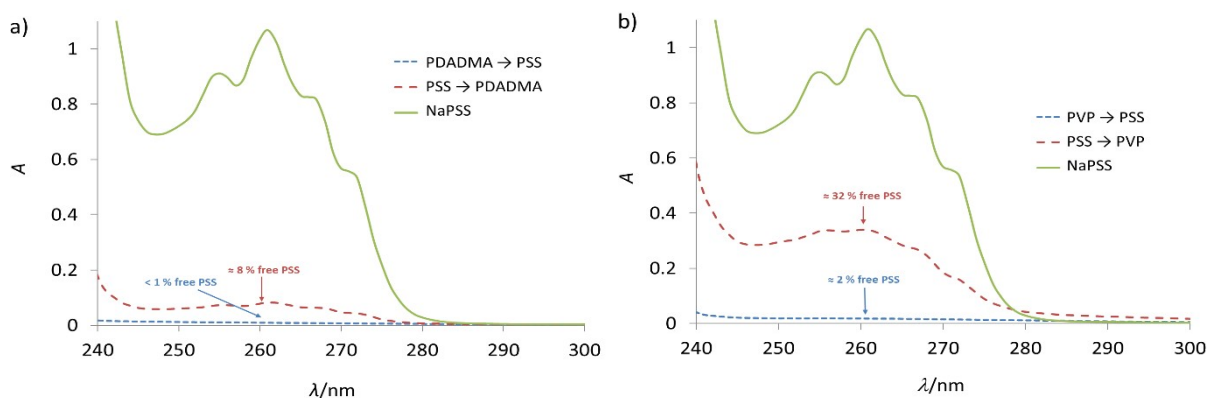

Figure S15. a) Spectra of supernatants obtained by centrifugation of suspensions prepared by titration of PDADMA·Cl with Na·PSS and *vice versa* at equimolar monomer ratios ( $c_m = 3.3 \times 10^{-3} \text{ mol dm}^{-3}$ ,  $l = 1 \text{ cm}$ ) in  $0.1 \text{ mol dm}^{-3}$  NaBr at  $25 \text{ }^\circ\text{C}$  and b) corresponding results for PVP·Br-Na·PSS system in  $0.5 \text{ mol dm}^{-3}$  NaBr.

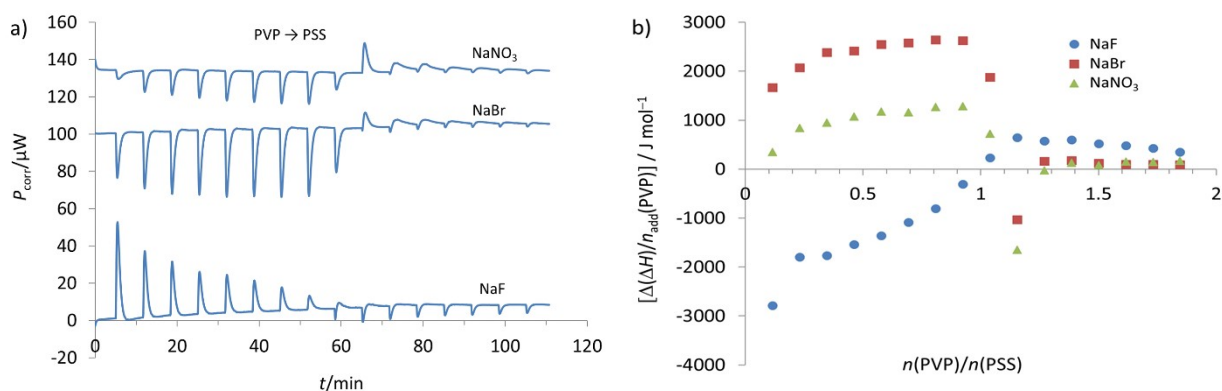

Figure S16. a) Corrected (stacked) thermograms and, b) successive normalized (divided by amount of titrant monomer added) enthalpy changes obtained during Na·PSS ( $c_m = 5 \times 10^{-3} \text{ mol dm}^{-3}$ ,  $V = 1.3 \text{ mL}$ ) titration with PVP·Br ( $c_m = 5 \times 10^{-2} \text{ mol dm}^{-3}$ ) in  $0.1 \text{ mol dm}^{-3}$  NaX at  $25.0 \text{ }^\circ\text{C}$ .

Table S4. Enthalpies of PVP-PSS primary negatively charged complex formation in  $0.1 \text{ mol dm}^{-3}$  NaX at  $25.0 \text{ }^\circ\text{C}$

| NaX               | $(\Delta_r H_{\text{PVP} \rightarrow \text{PSS}} \pm \text{SE}) / \text{kJ mol}^{-1}$ |
|-------------------|---------------------------------------------------------------------------------------|
| NaF               | $-1.94 \pm 0.09$                                                                      |
| NaNO <sub>3</sub> | $0.99 \pm 0.03$                                                                       |
| NaBr              | $2.27 \pm 0.07$                                                                       |



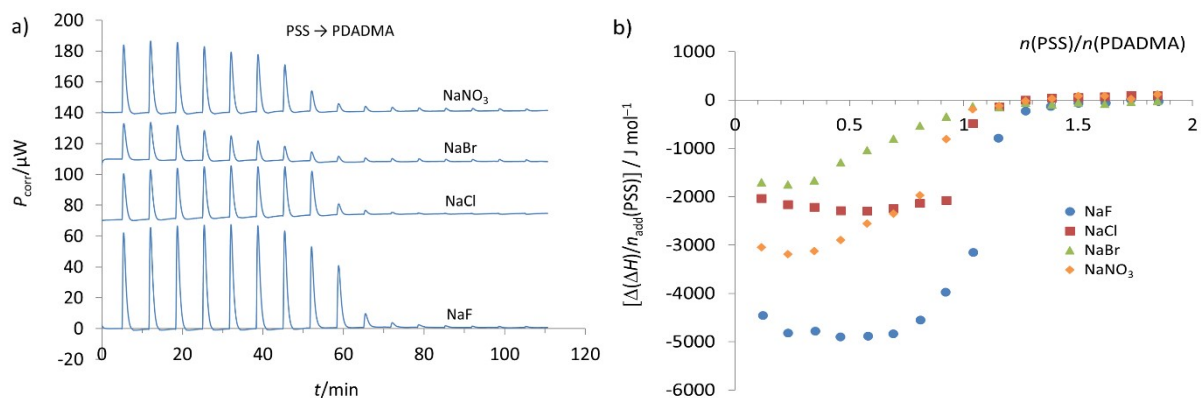

Figure S17. a) Corrected (stacked) thermograms and, b) successive normalized (divided by amount of titrant monomer added) enthalpy changes obtained during PDADMA·Cl ( $c_m = 5 \times 10^{-3} \text{ mol dm}^{-3}$ ,  $V = 1.3 \text{ mL}$ ) titration with Na·PSS ( $c_m = 5 \times 10^{-2} \text{ mol dm}^{-3}$ ) in  $0.1 \text{ mol dm}^{-3}$  NaX at  $25.0 \text{ }^\circ\text{C}$ .

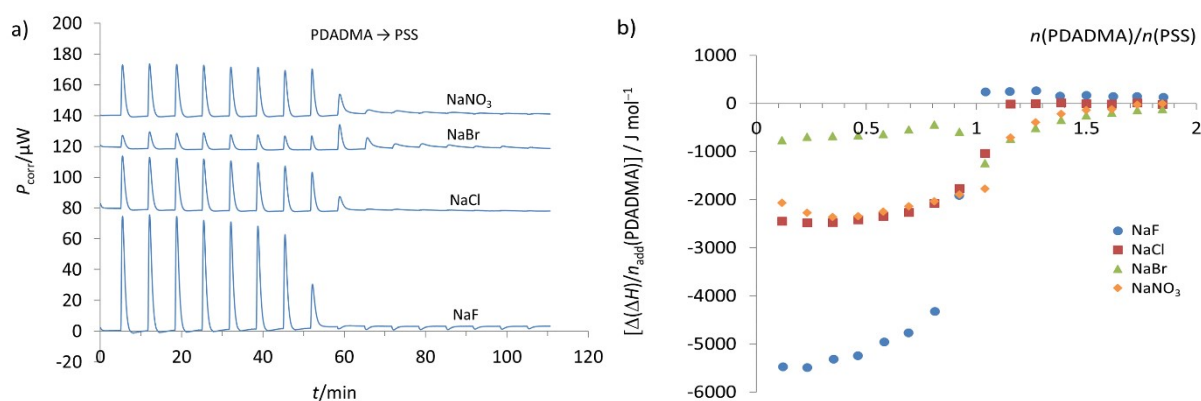

Figure S18. a) Corrected (stacked) thermograms and, b) successive normalized (divided by amount of titrant monomer added) enthalpy changes obtained by Na·PSS ( $c_m = 5 \times 10^{-3} \text{ mol dm}^{-3}$ ,  $V = 1.3 \text{ mL}$ ) titration with PDADMA·Cl ( $c_m = 5 \times 10^{-2} \text{ mol dm}^{-3}$ ) in  $0.1 \text{ mol dm}^{-3}$  NaX at  $25.0 \text{ }^\circ\text{C}$ .

Table S5. Enthalpies of PDADMA-PSS primary positively and negatively charged complex formation in  $0.1 \text{ mol dm}^{-3}$  NaX at  $25.0 \text{ }^\circ\text{C}$

| salt              | $(\Delta_r H_{\text{PSS} \rightarrow \text{PDADMA}} \pm \text{SE})/\text{kJ mol}^{-1}$ | $(\Delta_r H_{\text{PDADMA} \rightarrow \text{PSS}} \pm \text{SE})/\text{kJ mol}^{-1}$ |
|-------------------|----------------------------------------------------------------------------------------|----------------------------------------------------------------------------------------|
| NaF               | $-4.45 \pm 0.05$                                                                       | $-4.81 \pm 0.09$                                                                       |
| NaNO <sub>3</sub> | $-2.86 \pm 0.07$                                                                       | $-2.08 \pm 0.02$                                                                       |
| NaCl              | $-2.14 \pm 0.04$                                                                       | $-2.25 \pm 0.03$                                                                       |
| NaBr              | $-1.25 \pm 0.01$                                                                       | $-0.64 \pm 0.01$                                                                       |

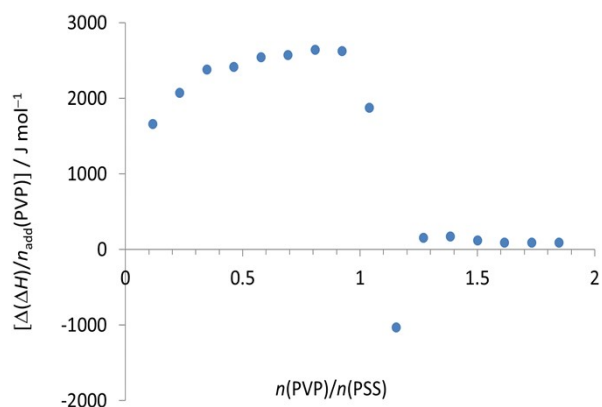

Figure S19. successive normalized (divided by amount of titrant monomer added) enthalpy changes obtained by Na·PSS ( $c_m = 5 \times 10^{-3} \text{ mol dm}^{-3}$ ,  $V = 1.3 \text{ mL}$ ) titration with PVP·Br ( $c_m = 5 \times 10^{-2} \text{ mol dm}^{-3}$ ) in  $0.1 \text{ mol dm}^{-3}$  NaBr at  $25.0 \text{ }^\circ\text{C}$ .

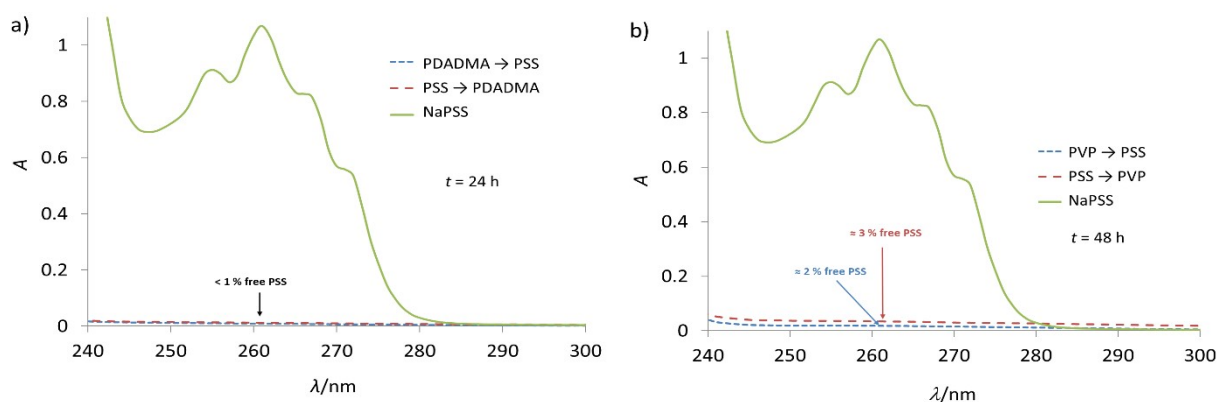

Figure S20. a) Spectra of supernatants obtained by centrifugation of suspensions prepared by titration of PDADMA·Cl with Na·PSS and *vice versa* at equimolar monomer ratio ( $c_m = 3.3 \times 10^{-3} \text{ mol dm}^{-3}$ ,  $l = 1 \text{ cm}$ ) in  $0.1 \text{ mol dm}^{-3}$  NaBr at  $25 \text{ }^\circ\text{C}$ , 24 h after preparation and b) corresponding results for PVP·Br·Na·PSS system in  $0.5 \text{ mol dm}^{-3}$  NaBr at  $25 \text{ }^\circ\text{C}$ , 48 h after preparation.

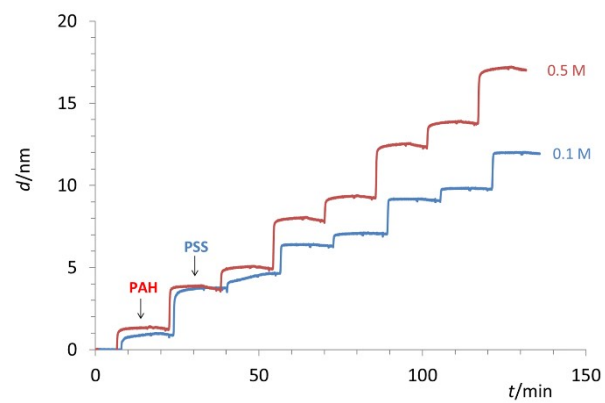

Figure S21. Thickness change during assembly of PAH/PSS ( $c_m(\text{PAH}) = c_m(\text{PSS}) = 1 \times 10^{-3} \text{ mol dm}^{-3}$ ) multilayers in NaCl at 25 °C; flow rate = 150  $\mu\text{L min}^{-1}$ .

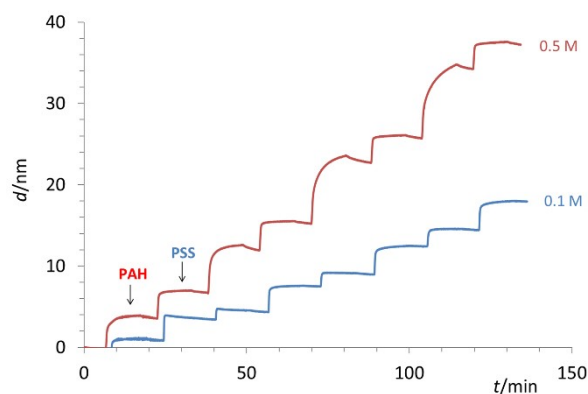

Figure S22. Thickness change during assembly of PAH/PSS ( $c_m(\text{PAH}) = c_m(\text{PSS}) = 1 \times 10^{-3} \text{ mol dm}^{-3}$ ) multilayers in  $\text{NaClO}_4$  at  $25^\circ\text{C}$ ; flow rate =  $150 \mu\text{L min}^{-1}$ .

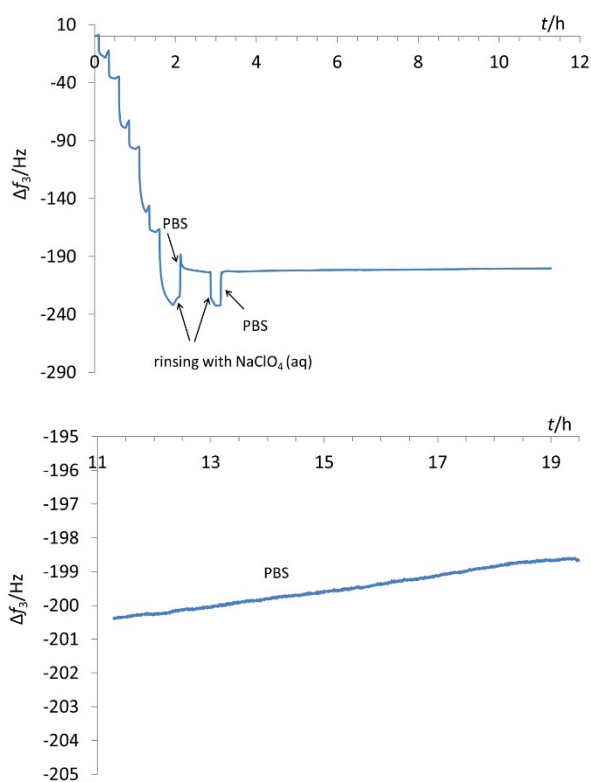

Figure S23. Frequency shift (third harmonic) of oscillating quartz crystal during assembly of PAH/PSS ( $c_m(\text{PAH}) = c_m(\text{PSS}) = 1 \times 10^{-3} \text{ mol dm}^{-3}$ ) multilayers in  $0.5 \text{ mol dm}^{-3} \text{ NaClO}_4$  solution and their alternating rinsing with PBS buffer ( $c(\text{PBS}) = 0.15 \text{ mol dm}^{-3}$ ,  $\text{pH} = 7.4$ ) and  $\text{NaClO}_4$  ( $0.5 \text{ mol dm}^{-3}$ ),  $\vartheta = 25.0^\circ\text{C}$ .
